# Supplementary material for: Avian influenza virus prevalence in marine birds is dependent on ocean temperatures
Source: PubMed Central journal article supplement (PMC7317457; doi:10.1002/eap.2040), 2019-12-27

**Supporting Information.** Jeffrey S. Hall, Robert J. Dusek, Sean W. Nashold, Joshua L. TeSlaa, R. Bradford Allen, and Daniel A. Gear. 2019. Avian influenza virus prevalence in marine birds is dependent on ocean temperatures. *Ecological Applications*.

## **Appendix S1**

Table S1: Model selection statistics and coefficient estimates for binomial linear models examining the sampling covariates effect on the probability of detection AIV via RT-PCR diagnostics. We excluded 91 swabs for this analysis that did not have data recorded for all covariates (n = 2785). Coefficient estimates and 95% maximum likelihood confidence intervals (CI) are reported on the logit scale. Coefficient with NA values were not included in that candidate model. The set of sample predictor variables,  $\beta x$ , were estimated with categorical coefficients in addition to the baseline detection probability,  $\alpha$  (regression intercept), and included the effects of categorical covariates of sampling season defined as the year that sampling was initiated during a sampling period,  $j$  (2012-2013; 2015-2017) relative to 2011, the species sampled based on taxonomic order Charadriiformes (gulls) relative to Anseriformes (ducks), and age category of the sampled bird defined as juvenile (hatch year) relative to adult (after hatch year).

| Sample covariate models | k | logLik  | AICc   | $\Delta$ AICc | weight | alpha (intercept)          | Age HY                    | 2012                       | 2013                     | 2015                      | 2016                      | 2017                      | Species Gull             |
|-------------------------|---|---------|--------|---------------|--------|----------------------------|---------------------------|----------------------------|--------------------------|---------------------------|---------------------------|---------------------------|--------------------------|
| season                  | 6 | -233.33 | 478.69 | 0             | 0.49   | -3.875<br>(-4.535, -3.33)  | NA                        | -1.703<br>(-3.572, -0.382) | 0.607<br>(-0.176, 1.421) | 0.027<br>(-0.857, 0.899)  | -0.868<br>(-2.156, 0.213) | -0.208<br>(-1.282, 0.767) | NA                       |
| season + species        | 7 | -233.09 | 480.23 | 1.54          | 0.23   | -3.875<br>(-4.535, -3.33)  | NA                        | -1.729<br>(-3.6, -0.405)   | 0.541<br>(-0.272, 1.377) | -0.007<br>(-0.897, 0.872) | -0.914<br>(-2.21, 0.176)  | -0.233<br>(-1.31, 0.746)  | 0.326<br>(-0.673, 1.159) |
| season + age            | 7 | -233.33 | 480.7  | 2.01          | 0.18   | -3.875<br>(-4.536, -3.328) | -0.011<br>(-1.236, 0.936) | -1.703<br>(-3.572, -0.382) | 0.607<br>(-0.177, 1.421) | 0.029<br>(-0.87, 0.913)   | -0.866<br>(-2.162, 0.223) | -0.208<br>(-1.282, 0.768) | NA                       |
| season + age + species  | 8 | -233.09 | 482.23 | 3.54          | 0.08   | -3.873<br>(-4.534, -3.327) | -0.058<br>(-1.291, 0.90)  | -1.729<br>(-3.6, -0.405)   | 0.541<br>(-0.271, 1.377) | 0.001<br>(-0.902, 0.89)   | -0.907<br>(-2.209, 0.19)  | -0.233<br>(-1.309, 0.746) | 0.332<br>(-0.674, 1.174) |
| null (intercept only)   | 1 | -242.5  | 487.01 | 8.32          | 0.01   | -4.043<br>(-4.343, -3.771) | NA                        | NA                         | NA                       | NA                        | NA                        | NA                        | NA                       |
| species                 | 2 | -242.03 | 488.07 | 9.38          | <0.01  | -4.090<br>(-4.411, -3.799) | NA                        | NA                         | NA                       | NA                        | NA                        | NA                        | 0.452<br>(-0.52, 1.243)  |
| age                     | 2 | -242.5  | 489    | 10.31         | <0.01  | -4.039<br>(-4.352, -3.754) | -0.056<br>(-1.262, 0.857) | NA                         | NA                       | NA                        | NA                        | NA                        | NA                       |
| age + species           | 3 | -242    | 490.01 | 11.33         | <0.01  | -4.081<br>(-4.41, -3.782)  | -0.126<br>(-1.341, 0.8)   | NA                         | NA                       | NA                        | NA                        | NA                        | 0.468<br>(-0.512, 1.269) |

Table S2: Model selection statistics and coefficient estimates for binomial linear models examining the season and optimal temperature function w covariates effect on the probability of detection AIV via RT-PCR diagnostics (n = 2876). We performed model selection by comparing models with one sea temperature metric-time lag combination at a time because of the high co-linearity of the sea temperature data. Our candidate set of models included daily mean, daily minimum, and daily maximum sea temperature at daily time lags of 0 (temperature on the day of sampling) to 14 days prior to sampling and with the mean, minimum, maximum, and standard deviation of temperatures aggregated within the 0-7, 3-10, and 7-14 days prior to each sample. The effects of categorical covariates of sampling season defined as the year that sampling was initiated during a sampling period, *j* (2012-2013; 2015-2017) relative to 2011. Coefficient estimates and 95% maximum likelihood confidence intervals (CI) are reported on the logit scale.

| Days lag | sea temp metric | k | logLik  | AICc   | ΔAICc | weight | alpha (intercept)         | Season 2012             | Season 2013           | Season 2015            | Season 2016            | Season 2017           | Optimal temperature function coefficients |                         |
|----------|-----------------|---|---------|--------|-------|--------|---------------------------|-------------------------|-----------------------|------------------------|------------------------|-----------------------|-------------------------------------------|-------------------------|
|          |                 |   |         |        |       |        |                           |                         |                       |                        |                        |                       | <i>t</i>                                  | <i>t</i> <sup>2</sup>   |
| 11       | Min             | 8 | -236.28 | 488.62 | 0.00  | 0.45   | -9.25<br>(-15.44, -5.03)  | -1.99<br>(-3.88, -0.63) | 0.59<br>(-0.36, 1.54) | -0.22<br>(-1.12, 0.68) | -0.94<br>(-2.26, 0.17) | 0.14<br>(-0.82, 1.06) | 1.68<br>(0.57, 3.31)                      | -0.12<br>(-0.23, -0.05) |
| 11       | Mean            | 8 | -238.16 | 492.38 | 3.76  | 0.07   | -10.32<br>(-17.95, -5.27) | -1.81<br>(-3.7, -0.46)  | 0.79<br>(-0.14, 1.73) | -0.10<br>(-1, 0.8)     | -0.81<br>(-2.12, 0.29) | 0.23<br>(-0.74, 1.15) | 1.70<br>(0.47, 3.53)                      | -0.11<br>(-0.22, -0.03) |
| 10       | Min             | 8 | -238.32 | 492.69 | 4.07  | 0.06   | -8.93<br>(-14.69, -5.02)  | -1.72<br>(-3.6, -0.36)  | 0.90<br>(-0.02, 1.83) | -0.05<br>(-0.96, 0.85) | -0.76<br>(-2.07, 0.35) | 0.15<br>(-0.81, 1.07) | 1.40<br>(0.37, 2.9)                       | -0.09<br>(-0.19, -0.02) |
| 10       | Mean            | 8 | -238.50 | 493.05 | 4.43  | 0.05   | -10.07<br>(-17.49, -5.23) | -1.73<br>(-3.62, -0.38) | 0.87<br>(-0.07, 1.8)  | -0.05<br>(-0.97, 0.85) | -0.76<br>(-2.07, 0.36) | 0.20<br>(-0.77, 1.11) | 1.61<br>(0.4, 3.43)                       | -0.10<br>(-0.22, -0.02) |
| 12       | Min             | 8 | -239.06 | 494.18 | 5.56  | 0.03   | -7.15<br>(-11.79, -3.72)  | -1.94<br>(-3.83, -0.58) | 0.52<br>(-0.41, 1.46) | -0.19<br>(-1.1, 0.71)  | -0.99<br>(-2.3, 0.13)  | 0.17<br>(-0.8, 1.08)  | 1.08<br>(0.18, 2.3)                       | -0.08<br>(-0.16, -0.02) |
| 9        | Max             | 8 | -239.49 | 495.03 | 6.41  | 0.02   | -9.98<br>(-18.11, -4.72)  | -1.71<br>(-3.59, -0.36) | 0.83<br>(-0.1, 1.77)  | -0.03<br>(-0.95, 0.87) | -0.78<br>(-2.1, 0.33)  | 0.18<br>(-0.78, 1.1)  | 1.49<br>(0.23, 3.39)                      | -0.09<br>(-0.2, 0.01)   |
| 14       | Min             | 8 | -239.61 | 495.26 | 6.64  | 0.02   | -9.13<br>(-15.98, -4.57)  | -1.65<br>(-3.53, -0.3)  | 0.89<br>(0.02, 1.78)  | 0.04<br>(-0.87, 0.94)  | -0.77<br>(-2.07, 0.33) | 0.24<br>(-0.73, 1.17) | 1.27<br>(0.18, 2.89)                      | -0.08<br>(-0.17, -0.01) |
| 7-14     | Min             | 8 | -239.68 | 495.41 | 6.79  | 0.02   | -7.01<br>(-10.88, -4.21)  | -1.64<br>(-3.52, -0.29) | 1.05<br>(0.07, 2.03)  | -0.01<br>(-0.91, 0.89) | -0.68<br>(-1.99, 0.42) | 0.10<br>(-0.86, 1.02) | 0.95<br>(0.13, 2.08)                      | -0.07<br>(-0.16, -0.01) |
| 7-14     | Mean            | 8 | -239.77 | 495.58 | 6.97  | 0.01   | -9.10<br>(-16.2, -4.48)   | -1.70<br>(-3.59, -0.34) | 0.88<br>(-0.07, 1.83) | -0.02<br>(-0.94, 0.89) | -0.77<br>(-2.08, 0.34) | 0.19<br>(-0.78, 1.11) | 1.30<br>(0.17, 2.99)                      | -0.08<br>(-0.18, -0.01) |
| 9        | Mean            | 8 | -239.78 | 495.61 | 6.99  | 0.01   | -8.62<br>(-15.1, -4.41)   | -1.70<br>(-3.59, -0.35) | 0.82<br>(-0.11, 1.76) | -0.04<br>(-0.97, 0.87) | -0.79<br>(-2.1, 0.33)  | 0.13<br>(-0.83, 1.05) | 1.23<br>(0.15, 2.83)                      | -0.08<br>(-0.18, -0.01) |
| 4        | Max             | 8 | -239.81 | 495.67 | 7.05  | 0.01   | -7.68<br>(-13.12, -3.75)  | -1.86<br>(-3.75, -0.49) | 0.56<br>(-0.44, 1.55) | -0.18<br>(-1.11, 0.73) | -1.00<br>(-2.35, 0.14) | 0.09<br>(-0.87, 1.01) | 1.18<br>(0.13, 2.6)                       | -0.08<br>(-0.18, -0.01) |
| 14       | Mean            | 8 | -239.86 | 495.76 | 7.15  | 0.01   | -9.74<br>(-17.7, -4.53)   | -1.62<br>(-3.5, -0.28)  | 0.92<br>(0.05, 1.81)  | 0.07<br>(-0.84, 0.96)  | -0.77<br>(-2.07, 0.32) | 0.25<br>(-0.73, 1.18) | 1.33<br>(0.14, 3.1)                       | -0.07<br>(-0.18, 0)     |
| 10       | Max             | 8 | -239.98 | 496.02 | 7.40  | 0.01   | -9.69<br>(-17.49, -4.45)  | -1.62<br>(-3.5, -0.28)  | 1.02<br>(0.1, 1.94)   | 0.07<br>(-0.84, 0.96)  | -0.74<br>(-2.04, 0.36) | 0.17<br>(-0.81, 1.1)  | 1.28<br>(0.08, 3.03)                      | -0.07<br>(-0.17, 0)     |
| 12       | Mean            | 8 | -239.99 | 496.02 | 7.41  | 0.01   | -7.94                     | -1.83                   | 0.66                  | -0.11                  | -0.90                  | 0.21                  | 1.13                                      | -0.07                   |

|      |      |   |         |        |      |      |                    |                    |                   |                  |                  |                  |                  |                   |                   |
|------|------|---|---------|--------|------|------|--------------------|--------------------|-------------------|------------------|------------------|------------------|------------------|-------------------|-------------------|
|      |      |   |         |        |      |      |                    | (-13.66,<br>-3.82) | (-3.71,<br>-0.47) | (-0.28,<br>1.6)  | (-1.03,<br>0.79) | (-2.22,<br>0.2)  | (-0.76,<br>1.12) | (0.11,<br>2.52)   | (-0.16,<br>-0.01) |
| 1    | Min  | 8 | -240.00 | 496.04 | 7.42 | 0.01 | -5.13              | -1.89              | 0.49              | -0.21            | -1.10            | 0.02             | 0.62             | -0.06             |                   |
|      |      |   |         |        |      |      | (-7.49,<br>-3.27)  | (-3.78,<br>-0.53)  | (-0.45,<br>1.45)  | (-1.13,<br>0.71) | (-2.44,<br>0.04) | (-0.94,<br>0.94) | (0.04,<br>1.38)  | (-0.12,<br>-0.01) |                   |
| 13   | Mean | 8 | -240.16 | 496.37 | 7.75 | 0.01 | -8.30              | -1.75              | 0.74              | -0.05            | -0.86            | 0.22             | 1.14             | -0.07             |                   |
|      |      |   |         |        |      |      | (-14.74,<br>-3.93) | (-3.63,<br>-0.4)   | (-0.16,<br>1.65)  | (-0.96,<br>0.85) | (-2.16,<br>0.25) | (-0.75,<br>1.14) | (0.09,<br>2.65)  | (-0.16,<br>-0.01) |                   |
| 14   | Max  | 8 | -240.19 | 496.43 | 7.81 | 0.01 | -9.09              | -1.56              | 1.10              | 0.16             | -0.77            | 0.10             | 0.99             | -0.05             |                   |
|      |      |   |         |        |      |      | (-15.9,<br>-4.23)  | (-3.43,<br>-0.23)  | (0.21,<br>2)      | (-0.74,<br>1.05) | (-2.07,<br>0.32) | (-0.88,<br>1.04) | (0.06,<br>2.34)  | (-0.12,<br>0)     |                   |
| 9    | Min  | 8 | -240.22 | 496.49 | 7.87 | 0.01 | -7.38              | -1.64              | 0.91              | 0.02             | -0.77            | 0.09             | 0.90             | -0.06             |                   |
|      |      |   |         |        |      |      | (-12.2,<br>-4.07)  | (-3.52,<br>-0.29)  | (-0.02,<br>1.86)  | (-0.91,<br>0.93) | (-2.08,<br>0.34) | (-0.87,<br>1.01) | (0.02,<br>2.17)  | (-0.14,<br>0.01)  |                   |
| 12   | Max  | 8 | -240.27 | 496.59 | 7.97 | 0.01 | -9.34              | -1.75              | 0.77              | -0.04            | -0.84            | 0.24             | 1.33             | -0.08             |                   |
|      |      |   |         |        |      |      | (-16.9,<br>-3.98)  | (-3.63,<br>-0.4)   | (-0.16,<br>1.69)  | (-0.95,<br>0.86) | (-2.15,<br>0.26) | (-0.73,<br>1.17) | (0.08,<br>3.04)  | (-0.18,<br>0)     |                   |
| 1    | Mean | 8 | -240.31 | 496.66 | 8.04 | 0.01 | -5.78              | -1.87              | 0.54              | -0.19            | -1.04            | 0.06             | 0.74             | -0.06             |                   |
|      |      |   |         |        |      |      | (-8.95,<br>-3.41)  | (-3.76,<br>-0.5)   | (-0.43,<br>1.53)  | (-1.12,<br>0.74) | (-2.39,<br>0.1)  | (-0.9,<br>0.97)  | (0.03,<br>1.7)   | (-0.14,<br>0)     |                   |
| 5    | Max  | 8 | -240.38 | 496.80 | 8.18 | 0.01 | -8.10              | -1.75              | 0.76              | -0.08            | -0.89            | 0.11             | 1.15             | -0.08             |                   |
|      |      |   |         |        |      |      | (-13.99,<br>-3.89) | (-3.64,<br>-0.39)  | (-0.21,<br>1.73)  | (-1.01,<br>0.83) | (-2.2,<br>0.23)  | (-0.85,<br>1.03) | (0.04,<br>2.63)  | (-0.17,<br>0)     |                   |
| 3-10 | Mean | 8 | -240.42 | 496.90 | 8.28 | 0.01 | -7.50              | -1.73              | 0.82              | -0.06            | -0.82            | 0.11             | 0.99             | -0.07             |                   |
|      |      |   |         |        |      |      | (-12.72,<br>-3.88) | (-3.62,<br>-0.35)  | (-0.17,<br>1.8)   | (-0.99,<br>0.86) | (-2.15,<br>0.3)  | (-0.86,<br>1.02) | (0.02,<br>2.35)  | (-0.16,<br>0)     |                   |
| 3-10 | Min  | 8 | -240.43 | 496.91 | 8.29 | 0.01 | -7.03              | -1.78              | 0.69              | -0.07            | -0.90            | 0.17             | 0.89             | -0.06             |                   |
|      |      |   |         |        |      |      | (-12.06,<br>-3.59) | (-3.66,<br>-0.43)  | (-0.22,<br>1.61)  | (-0.99,<br>0.83) | (-2.21,<br>0.21) | (-0.79,<br>1.09) | (0.02,<br>2.15)  | (-0.14,<br>0)     |                   |
| 1    | Max  | 8 | -240.44 | 496.93 | 8.32 | 0.01 | -6.63              | -1.84              | 0.59              | -0.17            | -1.00            | 0.10             | 0.91             | -0.07             |                   |
|      |      |   |         |        |      |      | (-10.71,<br>-3.56) | (-3.73,<br>-0.47)  | (-0.4,<br>1.59)   | (-1.11,<br>0.76) | (-2.35,<br>0.14) | (-0.86,<br>1.01) | (0.02,<br>2.07)  | (-0.15,<br>0)     |                   |
| 13   | Max  | 8 | -240.44 | 496.93 | 8.32 | 0.01 | -9.13              | -1.67              | 0.88              | 0.03             | -0.80            | 0.23             | 1.19             | -0.07             |                   |
|      |      |   |         |        |      |      | (-16.58,<br>-3.92) | (-3.55,<br>-0.34)  | (-0.01,<br>1.78)  | (-0.87,<br>0.92) | (-2.11,<br>0.29) | (-0.75,<br>1.16) | (0.03,<br>2.8)   | (-0.16,<br>0)     |                   |
| 8    | Mean | 8 | -240.46 | 496.98 | 8.36 | 0.01 | -7.44              | -1.58              | 1.04              | 0.09             | -0.75            | 0.08             | 0.80             | -0.04             |                   |
|      |      |   |         |        |      |      | (-12.64,<br>-3.8)  | (-3.46,<br>-0.23)  | (0.12,<br>1.96)   | (-0.83,<br>1)    | (-2.05,<br>0.35) | (-0.88,<br>1.01) | (-0.14,<br>2.08) | (-0.13,<br>0.02)  |                   |
| 5    | Mean | 8 | -240.48 | 497.00 | 8.38 | 0.01 | -6.70              | -1.81              | 0.66              | -0.11            | -0.94            | 0.06             | 0.89             | -0.06             |                   |
|      |      |   |         |        |      |      | (-11.15,<br>-3.52) | (-3.71,<br>-0.44)  | (-0.32,<br>1.64)  | (-1.03,<br>0.79) | (-2.26,<br>0.19) | (-0.9,<br>0.98)  | (0.02,<br>2.08)  | (-0.15,<br>0)     |                   |
| NA   | none | 6 | -242.49 | 497.01 | 8.39 | 0.01 | -3.90              | -1.68              | 0.63              | 0.04             | -0.94            | 0.03             | NA               | NA                |                   |
|      |      |   |         |        |      |      | (-4.56,<br>-3.35)  | (-3.55,<br>-0.36)  | (-0.15,<br>1.44)  | (-0.84,<br>0.92) | (-2.23,<br>0.14) | (-0.93, 0.95)    |                  |                   |                   |
| 4    | Mean | 8 | -240.49 | 497.04 | 8.42 | 0.01 | -6.07              | -1.83              | 0.59              | -0.15            | -0.97            | 0.04             | 0.77             | -0.06             |                   |
|      |      |   |         |        |      |      | (-9.89,<br>-3.33)  | (-3.73,<br>-0.46)  | (-0.41,<br>1.58)  | (-1.07,<br>0.77) | (-2.31,<br>0.17) | (-0.92,<br>0.96) | (0,<br>1.83)     | (-0.14,<br>0)     |                   |
| 8    | Min  | 8 | -240.51 | 497.07 | 8.45 | 0.01 | -6.42              | -1.51              | 1.11              | 0.16             | -0.74            | 0.04             | 0.52             | -0.03             |                   |
|      |      |   |         |        |      |      | (-10.28,<br>-3.62) | (-3.39,<br>-0.15)  | (0.18,<br>2.06)   | (-0.77,<br>1.07) | (-2.04,<br>0.36) | (-0.92,<br>0.96) | (-0.24,<br>1.53) | (-0.1,<br>0.03)   |                   |
| 11   | Max  | 8 | -240.58 | 497.21 | 8.59 | 0.01 | -4.61              | -1.57              | 0.80              | 0.13             | -0.85            | -0.06            | 0.03             | 0.00              |                   |
|      |      |   |         |        |      |      | (-8.06,<br>-1.52)  | (-3.45,<br>-0.24)  | (-0.18,<br>1.75)  | (-0.76,<br>1.02) | (-2.15,<br>0.24) | (-1.02,<br>0.86) | (-0.47,<br>0.6)  | (-0.02,<br>0.03)  |                   |
| 7    | Max  | 8 | -240.60 | 497.24 | 8.63 | 0.01 | -8.24              | -1.58              | 1.06              | 0.09             | -0.75            | 0.10             | 0.95             | -0.05             |                   |
|      |      |   |         |        |      |      | (-14.4,<br>-3.72)  | (-3.46,<br>-0.24)  | (0.14,<br>1.98)   | (-0.82,<br>0.98) | (-2.05,<br>0.35) | (-0.87,<br>1.02) | (-0.12,<br>2.36) | (-0.14,<br>0.01)  |                   |
| 4    | Min  | 8 | -240.74 | 497.53 | 8.92 | 0.01 | -5.53              | -1.78              | 0.67              | -0.11            | -0.91            | 0.03             | 0.61             | -0.05             |                   |
|      |      |   |         |        |      |      | (-8.55,<br>-3.32)  | (-3.67,<br>-0.41)  | (-0.31,<br>1.64)  | (-1.03,<br>0.8)  | (-2.24,<br>0.22) | (-0.94,<br>0.94) | (-0.03,<br>1.48) | (-0.12,<br>0.0)   |                   |
| 0-7  | Max  | 8 | -240.77 | 497.59 | 8.97 | 0.01 | -8.25              | -1.64              | 0.96              | 0.04             | -0.79            | 0.11             | 0.99             | -0.06             |                   |
|      |      |   |         |        |      |      | (-14.64,<br>-3.63) | (-3.52,<br>-0.29)  | (0.03,<br>1.88)   | (-0.87,<br>0.94) | (-2.1,<br>0.31)  | (-0.85,<br>1.03) | (-0.11,<br>2.46) | (-0.14,<br>0.01)  |                   |
| 3-10 | Min  | 8 | -240.78 | 497.60 | 8.99 | 0.01 | -5.53              | -1.69              | 0.79              | -0.06            | -0.73            | 0.06             | 0.63             | -0.06             |                   |

|      |      |   |         |        |       |      |                    |                   |                   |                  |                  |                  |                   |                  |                  |
|------|------|---|---------|--------|-------|------|--------------------|-------------------|-------------------|------------------|------------------|------------------|-------------------|------------------|------------------|
|      |      |   |         |        |       |      |                    | (-8.24,<br>-3.47) | (-3.58,<br>-0.33) | (-0.22,<br>1.78) | (-0.97,<br>0.85) | (-2.07,<br>0.4)  | (-0.9,<br>0.97)   | (-0.03,<br>1.52) | (-0.14,<br>0.01) |
| 3    | Max  | 8 | -240.82 | 497.70 | 9.08  | 0.00 | -6.81              | -1.82             | 0.62              | -0.14            | -0.96            | 0.08             | 0.91              | -0.07            |                  |
|      |      |   |         |        |       |      | (-11.76,<br>-3.28) | (-3.71,<br>-0.45) | (-0.4,<br>1.62)   | (-1.08,<br>0.79) | (-2.31,<br>0.18) | (-0.88,<br>0.99) | (-0.06,<br>2.22)  | (-0.15,<br>0.01) |                  |
| 7    | Mean | 8 | -240.85 | 497.75 | 9.13  | 0.00 | -6.61              | -1.53             | 1.05              | 0.12             | -0.75            | 0.06             | 0.57              | -0.03            |                  |
|      |      |   |         |        |       |      | (-11.04,<br>-3.34) | (-3.42,<br>-0.17) | (0.12,<br>1.98)   | (-0.8,<br>1.03)  | (-2.05,<br>0.34) | (-0.91,<br>0.98) | (-0.31,<br>1.69)  | (-0.1,<br>0.03)  |                  |
| 0    | Max  | 8 | -240.87 | 497.78 | 9.16  | 0.00 | -6.06              | -1.84             | 0.59              | -0.13            | -1.01            | 0.07             | 0.75              | -0.06            |                  |
|      |      |   |         |        |       |      | (-9.94,<br>-3.29)  | (-3.73,<br>-0.46) | (-0.4,<br>1.57)   | (-1.07,<br>0.79) | (-2.36,<br>0.12) | (-0.9,<br>0.98)  | (-0.06,<br>1.88)  | (-0.14,<br>0.01) |                  |
| 0-7  | Mean | 8 | -240.90 | 497.85 | 9.23  | 0.00 | -6.34              | -1.78             | 0.70              | -0.10            | -0.91            | 0.07             | 0.77              | -0.06            |                  |
|      |      |   |         |        |       |      | (-10.3,<br>-3.44)  | (-3.68,<br>-0.4)  | (-0.31,<br>1.71)  | (-1.05,<br>0.83) | (-2.25,<br>0.22) | (-0.9,<br>0.98)  | (-0.07,<br>1.88)  | (-0.14,<br>0.01) |                  |
| 7    | Min  | 8 | -240.93 | 497.90 | 9.28  | 0.00 | -5.95              | -1.50             | 1.07              | 0.13             | -0.75            | 0.05             | 0.42              | -0.02            |                  |
|      |      |   |         |        |       |      | (-9.35,<br>-3.37)  | (-3.39,<br>-0.14) | (0.14,<br>2)      | (-0.78,<br>1.04) | (-2.05,<br>0.35) | (-0.92,<br>0.97) | (-0.3,<br>1.33)   | (-0.08,<br>0.03) |                  |
| 0-7  | Min  | 8 | -240.97 | 497.98 | 9.36  | 0.00 | -4.92              | -1.73             | 0.72              | -0.06            | -0.83            | 0.06             | 0.45              | -0.04            |                  |
|      |      |   |         |        |       |      | (-6.96,<br>-3.31)  | (-3.62,<br>-0.36) | (-0.26,<br>1.7)   | (-0.99,<br>0.85) | (-2.16,<br>0.29) | (-0.9,<br>0.97)  | (-0.05,<br>1.15)  | (-0.11,<br>0.01) |                  |
| 0-7  | SD   | 8 | -240.97 | 497.98 | 9.37  | 0.00 | -6.00              | -1.79             | 0.60              | 0.01             | -0.85            | -0.09            | 6.30              | -4.22            |                  |
|      |      |   |         |        |       |      | (-9.02,<br>-3.53)  | (-3.67,<br>-0.44) | (-0.25,<br>1.47)  | (-0.89,<br>0.89) | (-2.16,<br>0.26) | (-1.06,<br>0.84) | (-0.74,<br>15.07) | (-10.4,<br>0.48) |                  |
| 6    | Max  | 8 | -240.97 | 498.00 | 9.38  | 0.00 | -7.70              | -1.69             | 0.83              | -0.01            | -0.84            | 0.11             | 0.96              | -0.06            |                  |
|      |      |   |         |        |       |      | (-13.67,<br>-3.44) | (-3.58,<br>-0.33) | (-0.13,<br>1.78)  | (-0.93,<br>0.9)  | (-2.15,<br>0.27) | (-0.85,<br>1.03) | (-0.15,<br>2.43)  | (-0.15,<br>0.02) |                  |
| 2    | Max  | 8 | -240.99 | 498.03 | 9.41  | 0.00 | -6.79              | -1.77             | 0.69              | -0.11            | -0.92            | 0.08             | 0.87              | -0.06            |                  |
|      |      |   |         |        |       |      | (-11.33,<br>-3.36) | (-3.67,<br>-0.41) | (-0.31,<br>1.69)  | (-1.06,<br>0.83) | (-2.26,<br>0.21) | (-0.88,<br>1)    | (-0.11,<br>2.11)  | (-0.15,<br>0.01) |                  |
| 6    | Mean | 8 | -241.12 | 498.28 | 9.66  | 0.00 | -6.69              | -1.68             | 0.83              | -0.01            | -0.85            | 0.08             | 0.75              | -0.05            |                  |
|      |      |   |         |        |       |      | (-11.34,<br>-3.39) | (-3.58,<br>-0.31) | (-0.14,<br>1.79)  | (-0.93,<br>0.89) | (-2.17,<br>0.26) | (-0.88,<br>0.99) | (-0.15,<br>1.96)  | (-0.13,<br>0.02) |                  |
| 0    | Mean | 8 | -241.35 | 498.75 | 10.13 | 0.00 | -4.95              | -1.84             | 0.54              | -0.12            | -1.05            | 0.02             | 0.47              | -0.04            |                  |
|      |      |   |         |        |       |      | (-7.65,<br>-2.94)  | (-3.73,<br>-0.46) | (-0.44,<br>1.53)  | (-1.05,<br>0.8)  | (-2.39,<br>0.09) | (-0.94,<br>0.94) | (-0.13,<br>1.31)  | (-0.11,<br>0.01) |                  |
| 3-10 | Max  | 8 | -241.36 | 498.77 | 10.16 | 0.00 | -6.39              | -1.55             | 1.05              | 0.15             | -0.79            | -0.01            | 0.41              | -0.02            |                  |
|      |      |   |         |        |       |      | (-10.23,<br>-3.12) | (-3.43,<br>-0.22) | (0.1,<br>1.99)    | (-0.75,<br>1.03) | (-2.09,<br>0.3)  | (-0.97,<br>0.91) | (-0.13,<br>1.04)  | (-0.04,<br>0.01) |                  |
| 3    | Mean | 8 | -241.38 | 498.81 | 10.19 | 0.00 | -5.51              | -1.80             | 0.62              | -0.12            | -0.95            | 0.03             | 0.57              | -0.05            |                  |
|      |      |   |         |        |       |      | (-8.84,<br>-2.99)  | (-3.7,<br>0.42)   | (-0.4,<br>1.62)   | (-1.07,<br>0.81) | (-2.3,<br>0.19)  | (-0.94,<br>0.95) | (-0.16,<br>1.53)  | (-0.12,<br>0.01) |                  |
| 7-14 | Max  | 8 | -241.40 | 498.86 | 10.24 | 0.00 | -5.42              | -1.59             | 0.81              | 0.13             | -0.85            | -0.05            | 0.20              | -0.01            |                  |
|      |      |   |         |        |       |      | (-9.48,<br>-1.93)  | (-3.47,<br>-0.26) | (-0.17,<br>1.76)  | (-0.77,<br>1.01) | (-2.15,<br>0.24) | (-1.01,<br>0.87) | (-0.35,<br>0.83)  | (-0.03,<br>0.02) |                  |
| 2    | Mean | 8 | -241.43 | 498.91 | 10.29 | 0.00 | -5.46              | -1.74             | 0.72              | -0.07            | -0.92            | 0.04             | 0.50              | -0.04            |                  |
|      |      |   |         |        |       |      | (-8.38,<br>-3.19)  | (-3.64,<br>-0.36) | (-0.29,<br>1.74)  | (-1.02,<br>0.88) | (-2.25,<br>0.21) | (-0.92,<br>0.96) | (-0.17,<br>1.36)  | (-0.1,<br>0.02)  |                  |
| 5    | Min  | 8 | -241.43 | 498.91 | 10.29 | 0.00 | -5.34              | -1.75             | 0.67              | -0.06            | -0.93            | 0.03             | 0.50              | -0.04            |                  |
|      |      |   |         |        |       |      | (-8.59,<br>-3.04)  | (-3.64,<br>-0.38) | (-0.3,<br>1.65)   | (-0.96,<br>0.84) | (-2.25,<br>0.19) | (-0.93,<br>0.95) | (-0.14,<br>1.41)  | (-0.11,<br>0.01) |                  |
| 6    | Min  | 8 | -241.56 | 499.18 | 10.56 | 0.00 | -5.64              | -1.62             | 0.88              | 0.03             | -0.83            | 0.05             | 0.45              | -0.03            |                  |
|      |      |   |         |        |       |      | (-9.09,<br>-3.18)  | (-3.52,<br>-0.24) | (-0.1,<br>1.85)   | (-0.88,<br>0.94) | (-2.14,<br>0.28) | (-0.91,<br>0.97) | (-0.23,<br>1.4)   | (-0.1,<br>0.03)  |                  |
| 8    | Max  | 8 | -241.57 | 499.19 | 10.57 | 0.00 | -5.98              | -1.55             | 1.02              | 0.15             | -0.79            | 0.00             | 0.35              | -0.01            |                  |
|      |      |   |         |        |       |      | (-9.46,<br>-2.95)  | (-3.42,<br>-0.21) | (0.06,<br>1.98)   | (-0.75,<br>1.04) | (-2.09,<br>0.3)  | (-0.96,<br>0.92) | (-0.16,<br>0.94)  | (-0.04,<br>0.01) |                  |
| 2    | Min  | 8 | -241.60 | 499.25 | 10.63 | 0.00 | -4.95              | -1.70             | 0.76              | -0.02            | -0.89            | 0.04             | 0.35              | -0.03            |                  |
|      |      |   |         |        |       |      | (-7.16,<br>-3.2)   | (-3.6,<br>-0.32)  | (-0.23,<br>1.76)  | (-0.97,<br>0.92) | (-2.22,<br>0.23) | (-0.93,<br>0.95) | (-0.16,<br>1.01)  | (-0.08,<br>0.02) |                  |
| 3    | Min  | 8 | -241.65 | 499.35 | 10.73 | 0.00 | -4.87              | -1.78             | 0.61              | -0.10            | -0.94            | 0.01             | 0.40              | -0.03            |                  |
|      |      |   |         |        |       |      | (-7.35,<br>-2.91)  | (-3.68,<br>-0.4)  | (-0.4,<br>1.61)   | (-1.05,<br>0.84) | (-2.29,<br>0.2)  | (-0.96,<br>0.93) | (-0.18,<br>1.16)  | (-0.1,<br>0.02)  |                  |
| 0    | Min  | 8 | -241.89 | 499.82 | 11.21 | 0.00 | -4.30              | -1.79             | 0.55              | -0.07            | -1.04            | 0.01             | 0.25              | -0.03            |                  |

|      |    |   |         |        |       |      |                   |                   |                  |                  |                  |                  |                  |                  |
|------|----|---|---------|--------|-------|------|-------------------|-------------------|------------------|------------------|------------------|------------------|------------------|------------------|
|      |    |   |         |        |       |      | (-6.24,<br>-2.75) | (-3.69,<br>-0.42) | (-0.43,<br>1.53) | (-0.98,<br>0.84) | (-2.38,<br>0.09) | (-0.95,<br>0.93) | (-0.19,<br>0.87) | (-0.08,<br>0.02) |
| 7-14 | SD | 8 | -242.18 | 500.41 | 11.79 | 0.00 | -4.78             | -1.80             | 0.49             | 0.01             | -0.99            | -0.09            | 2.31             | -1.23            |
|      |    |   |         |        |       |      | (-7.56,<br>-2.43) | (-3.7,<br>-0.43)  | (-0.43,<br>1.41) | (-0.88,<br>0.89) | (-2.32,<br>0.13) | (-1.09,<br>0.87) | (-4.01,<br>9.94) | (-6.18,<br>2.64) |
| 7-14 | SD | 8 | -242.39 | 500.83 | 12.22 | 0.00 | -3.72             | -1.62             | 0.74             | 0.07             | -0.89            | 0.09             | -0.35            | 0.02             |
|      |    |   |         |        |       |      | (-6.18,<br>-1.66) | (-3.51,<br>-0.27) | (-0.19,<br>1.69) | (-0.83,<br>0.96) | (-2.2,<br>0.22)  | (-0.92,<br>1.06) | (-6.48,<br>6.72) | (-4.77,<br>4.09) |

Table S3. Numbers of each species sampled in each year of the study and number of influenza virus detections for each species.

| Species                                               | 2011 | 2012 | 2013 | 2015 | 2016 | 2017 | Total | PCR Positive |
|-------------------------------------------------------|------|------|------|------|------|------|-------|--------------|
| Barrow's Goldeneye, <i>Bucephala islandica</i>        | 1    |      |      | 1    |      |      | 2     |              |
| Black Duck, <i>Anas rubripes</i>                      | 6    | 13   | 11   | 3    | 2    | 4    | 39    |              |
| Black Scoter, <i>Melanitta nigra</i>                  | 5    | 27   | 7    | 14   | 8    | 21   | 82    | 1            |
| Bufflehead, <i>Bucephala albeola</i>                  | 114  | 36   | 47   | 50   | 60   | 37   | 344   | 12           |
| Canada Goose, <i>Branta canadensis</i>                |      |      |      |      | 2    | 2    | 4     |              |
| Common Eider, <i>Somateria mollissima</i>             | 238  | 256  | 134  | 189  | 246  | 221  | 1284  | 13           |
| Common Goldeneye, <i>Bucephala clangula</i>           | 16   | 18   | 26   | 37   | 10   | 6    | 113   | 2            |
| Great Black-backed Gull, <i>Larus marinus</i>         |      | 1    |      |      |      | 1    | 2     |              |
| Greater Scaup, <i>Aythya marila</i>                   |      |      |      | 3    |      | 1    | 4     |              |
| Herring Gull, <i>Larus argentatus</i>                 | 5    | 32   | 67   | 38   | 91   | 43   | 276   | 6            |
| Hooded Merganser, <i>Lophodytes cucullatus</i>        |      |      |      | 1    |      |      |       |              |
| King Eider, <i>Somateria spectabilis</i>              |      |      |      |      |      | 1    | 1     |              |
| Lesser Scaup, <i>Aythya affinis</i>                   |      |      |      |      | 1    |      | 1     |              |
| Long-tailed Duck, <i>Clangula hyemalis</i>            | 113  | 67   | 61   | 96   | 38   | 29   | 404   | 8            |
| Mallard, <i>Anas platyrhynchos</i>                    | 2    | 8    | 9    | 2    | 13   | 2    | 36    | 2            |
| Northern Shoveler, <i>Anas clypeata</i>               |      |      | 1    |      |      |      | 1     | 1            |
| Ring-billed Gull, <i>Larus delawarensis</i>           | 7    | 4    | 6    | 5    | 2    | 2    | 26    |              |
| Red-breasted Merganser, <i>Mergus serrator</i>        | 20   | 15   | 6    | 5    | 7    | 9    | 62    |              |
| Ruddy Duck, <i>Oxyura jamaicensis</i>                 |      | 1    |      |      |      |      | 1     |              |
| Surf Scoter, <i>Melanitta perspicillata</i>           | 10   | 7    | 13   | 29   | 13   | 3    | 75    | 2            |
| White-winged Scoter, <i>Histrionicus histrionicus</i> | 17   | 47   | 21   | 9    | 17   | 8    | 119   | 2            |
| Total                                                 | 554  | 532  | 409  | 482  | 510  | 390  | 2876  | 49           |

Figure S1. Model selection using AIC weights (wAIC) on avian influenza virus detection as the response to optimal sea temperature function across 0-14 days prior to sampling (lag) and temperature metric indicated the best fitting model included the effect of sampling year and the minimum temperature 11 days prior to sampling.

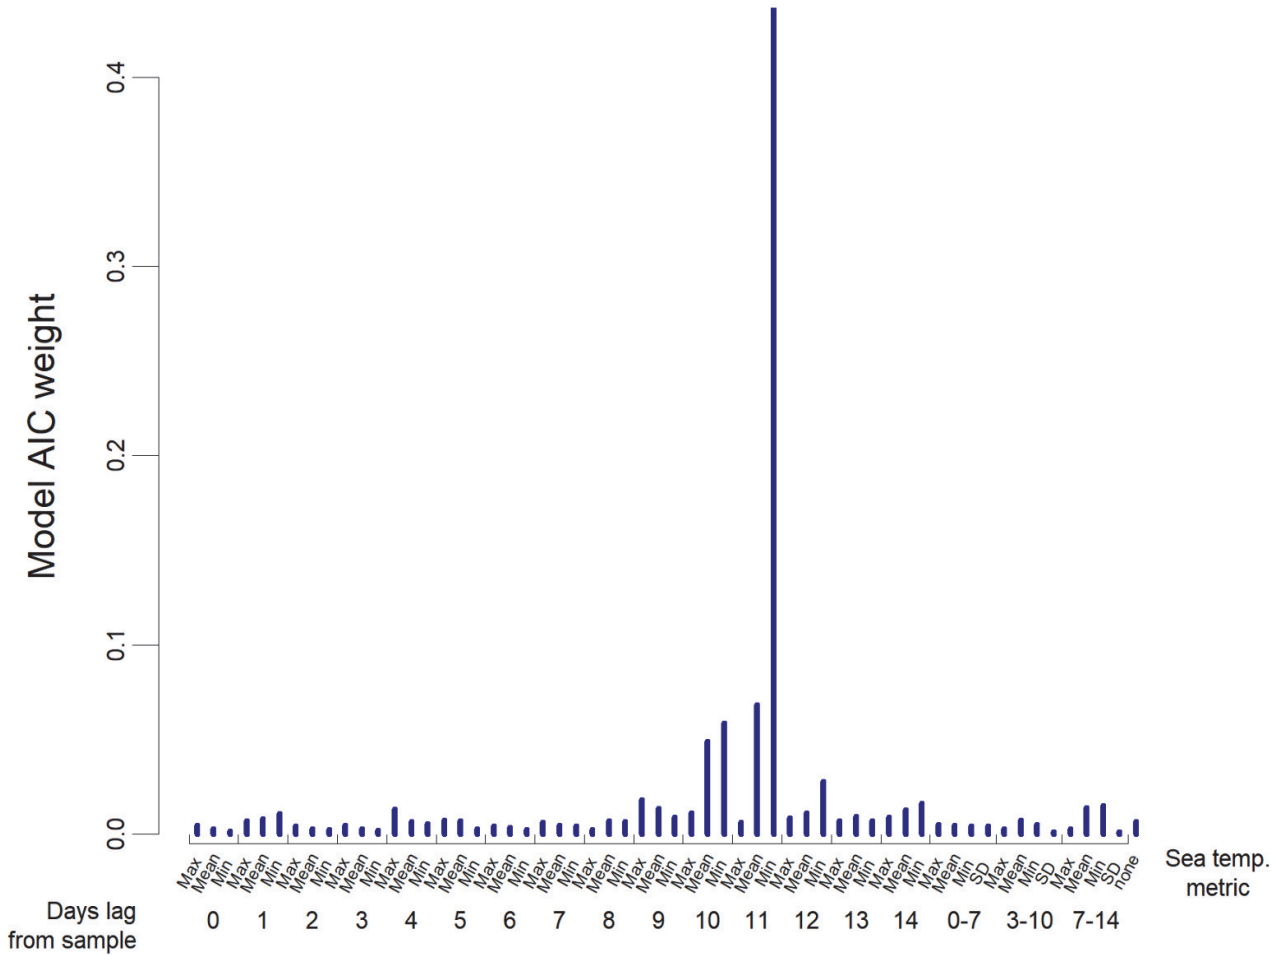

Supplement: EAP-30-e02040-s001.pdf [file EAP-30-e02040-s001.pdf]
